# Supplementary material for: Causes of In-Hospital Death and Pharmaceutical Associations with Age of Death during a 10-Year Period (2011–2020) in Individuals with and without Diabetes at a Japanese Community General Hospital
Source: MDPI journal article supplement (doi:10.3390/jcm13051283), 2024-02-24
Supplement: s1 [file s1]

Figure S1

# Population compositions of Anan City and All Japan

## Anan City, Tokushima, Japan

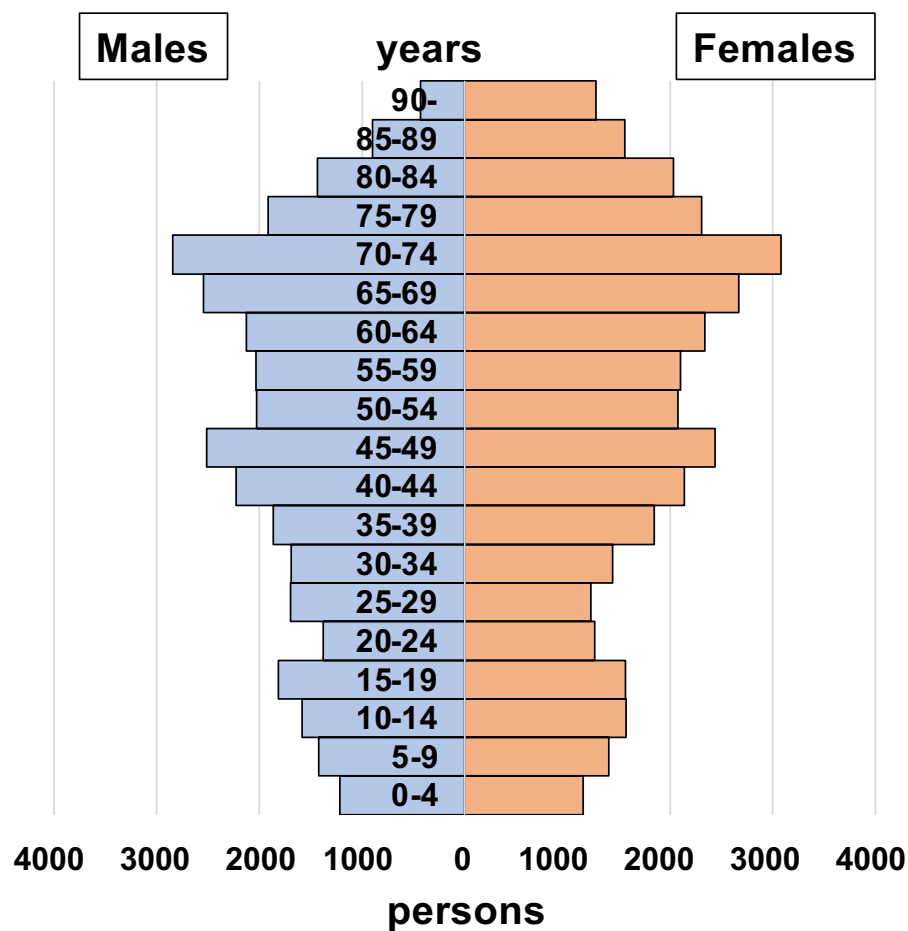

[https://www.city.anan.tokushima.jp/docs/2021031900082/file\\_contents/setai.pdf](https://www.city.anan.tokushima.jp/docs/2021031900082/file_contents/setai.pdf)

## All Japan

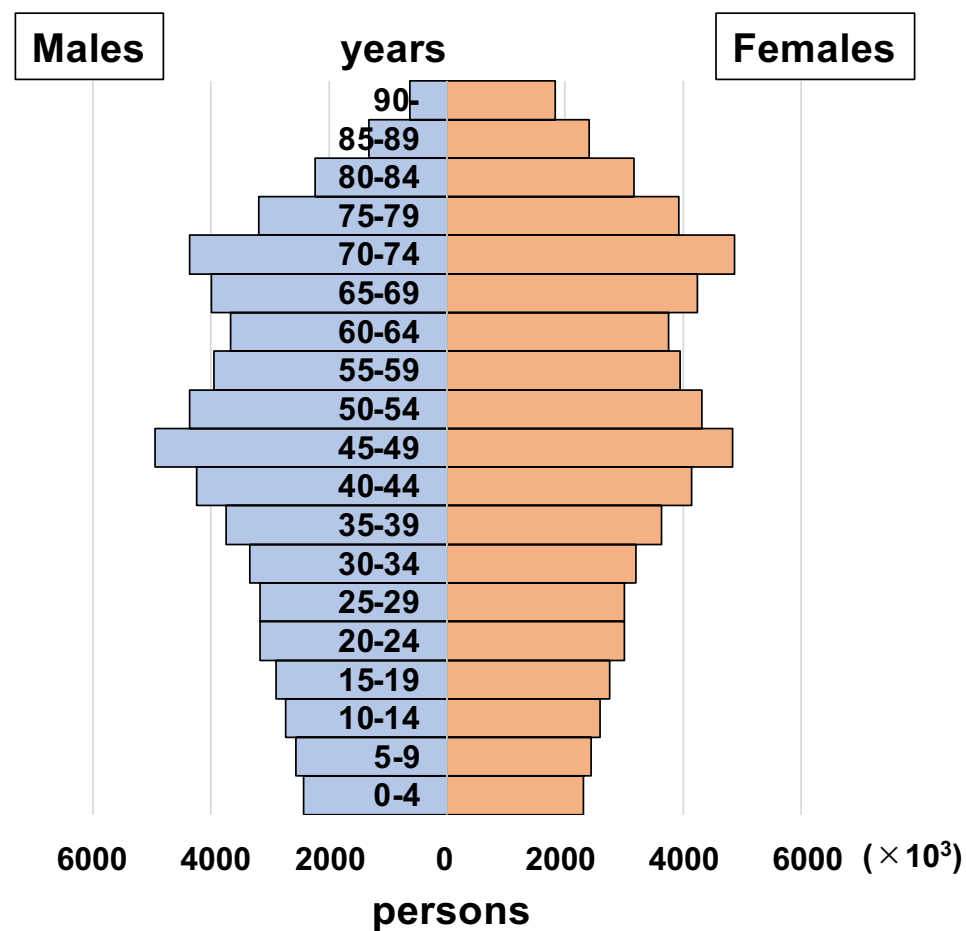

<https://www.ipss.go.jp/site-ad/TopPageData/2020.png>

Figure S2

(a) Rates of death from different causes in males with and those without diabetes (n=1206)

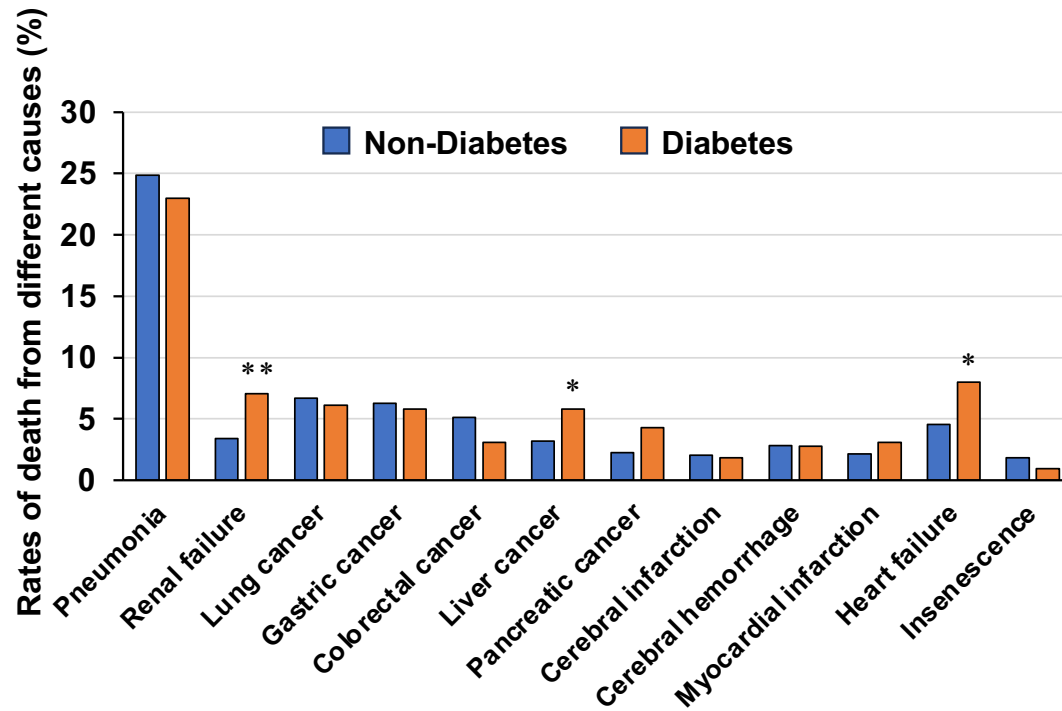

(b) Rates of death from different causes in females with and those without diabetes (n=1130)

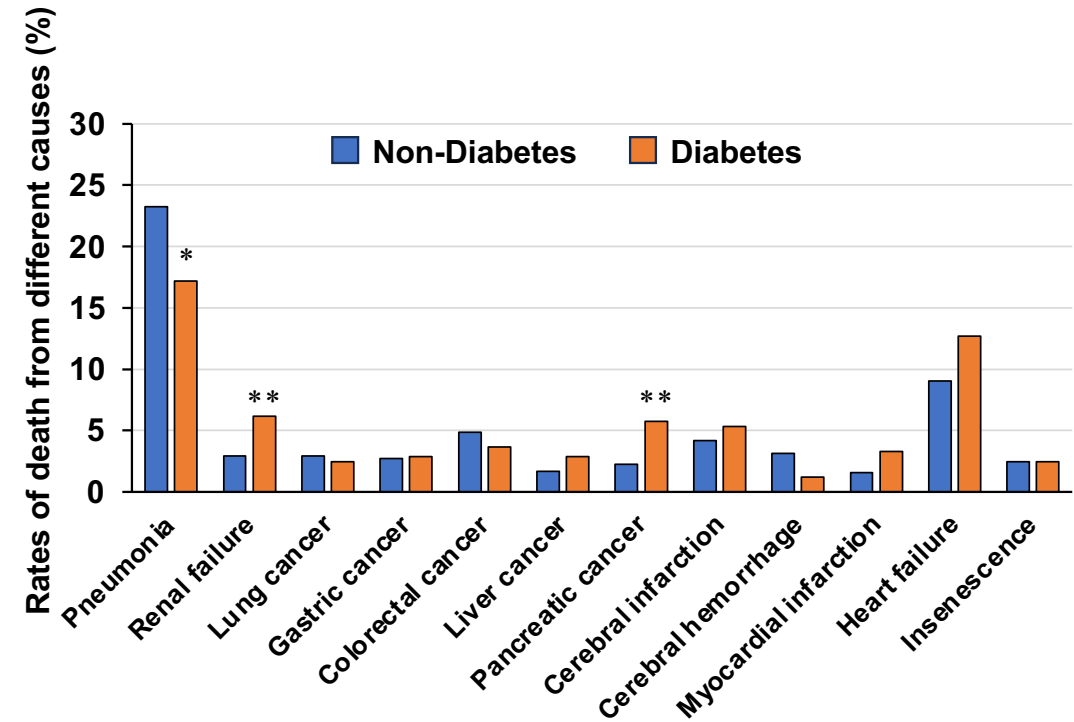

\*  $p < 0.05$ , \*\*  $p < 0.01$  vs non-diabetics

Table S1

## Causes of in-hospital death during the period from 2011 to 2020 at our community general hospital

| Cause of death           | All subjects (Total: 2336; Males: 1206; Females: 1130) |       |         |       |       |       | Non-Diabetes (Total: 1766; Males: 880; Females: 886) |       |         |       |       |       | Diabetes (Total: 570; Males: 326; Females: 244)<br>T1D (7), T2D (498), Others or Unknown (65) |       |         |       |       |       |
|--------------------------|--------------------------------------------------------|-------|---------|-------|-------|-------|------------------------------------------------------|-------|---------|-------|-------|-------|-----------------------------------------------------------------------------------------------|-------|---------|-------|-------|-------|
|                          | Males                                                  |       | Females |       | Total |       | Males                                                |       | Females |       | Total |       | Males                                                                                         |       | Females |       | Total |       |
|                          | n                                                      | %     | n       | %     | n     | %     | n                                                    | %     | n       | %     | n     | %     | n                                                                                             | %     | n       | %     | n     | %     |
| Pneumonia                | 294                                                    | 24.4  | 248     | 21.9  | 542   | 23.2  | 219                                                  | 24.9  | 206     | 23.3  | 425   | 24.1  | 75                                                                                            | 23.0  | 42      | 17.2  | 117   | 20.5  |
| Other infections         | 66                                                     | 5.5   | 84      | 7.4   | 150   | 6.4   | 48                                                   | 5.5   | 61      | 6.9   | 109   | 6.2   | 18                                                                                            | 5.5   | 23      | 9.4   | 41    | 7.2   |
| Renal failure**          | 53                                                     | 4.4   | 41      | 3.6   | 94    | 4.0   | 30                                                   | 3.4   | 26      | 2.9   | 56    | 3.2   | 23                                                                                            | 7.1   | 15      | 6.1   | 38    | 6.7   |
| Neoplasms                | 429                                                    | 35.6  | 312     | 27.5  | 741   | 31.8  | 325                                                  | 37.0  | 248     | 28.1  | 573   | 32.4  | 104                                                                                           | 31.8  | 64      | 26.2  | 168   | 29.6  |
| Lung cancer              | 79                                                     | 6.6   | 32      | 2.8   | 111   | 4.8   | 59                                                   | 6.7   | 26      | 2.9   | 85    | 4.8   | 20                                                                                            | 6.1   | 6       | 2.5   | 26    | 4.6   |
| Esophageal cancer        | 17                                                     | 1.4   | 3       | 0.3   | 20    | 0.9   | 17                                                   | 1.9   | 2       | 0.2   | 19    | 1.1   | 0                                                                                             | 0.0   | 1       | 0.4   | 1     | 0.2   |
| Gastric cancer           | 74                                                     | 6.1   | 31      | 2.7   | 105   | 4.5   | 55                                                   | 6.3   | 24      | 2.7   | 79    | 4.5   | 19                                                                                            | 5.8   | 7       | 2.9   | 26    | 4.6   |
| Colorectal cancer        | 55                                                     | 4.6   | 52      | 4.6   | 107   | 4.6   | 45                                                   | 5.1   | 43      | 4.9   | 88    | 5.0   | 10                                                                                            | 3.1   | 9       | 3.7   | 19    | 3.3   |
| Liver cancer**           | 47                                                     | 3.9   | 22      | 1.9   | 69    | 3.0   | 28                                                   | 3.2   | 15      | 1.7   | 43    | 2.4   | 19                                                                                            | 5.8   | 7       | 2.9   | 26    | 4.6   |
| Pancreatic cancer**      | 34                                                     | 2.8   | 34      | 3.0   | 68    | 2.9   | 20                                                   | 2.3   | 20      | 2.3   | 40    | 2.3   | 14                                                                                            | 4.3   | 14      | 5.7   | 28    | 4.9   |
| Breast cancer            | 0                                                      | 0.0   | 14      | 1.2   | 14    | 0.6   | 0                                                    | 0.0   | 13      | 1.5   | 13    | 0.7   | 0                                                                                             | 0.0   | 1       | 0.4   | 1     | 0.2   |
| Uterine cancer           | 0                                                      | 0.0   | 10      | 0.9   | 10    | 0.4   | 0                                                    | 0.0   | 9       | 1.0   | 9     | 0.5   | 0                                                                                             | 0.0   | 1       | 0.4   | 1     | 0.2   |
| Leukemia                 | 12                                                     | 1.0   | 9       | 0.8   | 21    | 0.9   | 10                                                   | 1.1   | 8       | 0.9   | 18    | 1.0   | 2                                                                                             | 0.6   | 1       | 0.4   | 3     | 0.5   |
| Lymphoma                 | 15                                                     | 1.2   | 15      | 1.3   | 30    | 1.3   | 13                                                   | 1.5   | 12      | 1.4   | 25    | 1.4   | 2                                                                                             | 0.6   | 3       | 1.2   | 5     | 0.9   |
| MDS                      | 1                                                      | 0.1   | 4       | 0.4   | 5     | 0.2   | 0                                                    | 0.0   | 4       | 0.5   | 4     | 0.2   | 1                                                                                             | 0.3   | 0       | 0.0   | 1     | 0.2   |
| Other neoplasms          | 95                                                     | 7.9   | 86      | 7.6   | 181   | 7.7   | 78                                                   | 8.9   | 72      | 8.1   | 150   | 8.5   | 17                                                                                            | 5.2   | 14      | 5.7   | 31    | 5.4   |
| Cerebrovascular Diseases | 60                                                     | 5.0   | 96      | 8.4   | 156   | 6.7   | 45                                                   | 5.0   | 79      | 9.0   | 124   | 7.0   | 15                                                                                            | 4.6   | 17      | 6.9   | 32    | 5.6   |
| Cerebral infarction      | 24                                                     | 2.0   | 50      | 4.4   | 74    | 3.2   | 18                                                   | 2.0   | 37      | 4.2   | 55    | 3.1   | 6                                                                                             | 1.8   | 13      | 5.3   | 19    | 3.3   |
| Cerebral hemorrhage      | 34                                                     | 2.8   | 31      | 2.7   | 65    | 2.8   | 25                                                   | 2.8   | 28      | 3.2   | 53    | 3.0   | 9                                                                                             | 2.8   | 3       | 1.2   | 12    | 2.1   |
| SAH                      | 2                                                      | 0.2   | 15      | 1.3   | 17    | 0.7   | 2                                                    | 0.2   | 14      | 1.6   | 16    | 0.9   | 0                                                                                             | 0.0   | 1       | 0.4   | 1     | 0.2   |
| Cardiovascular Diseases  | 103                                                    | 8.6   | 136     | 12.0  | 239   | 10.3  | 65                                                   | 7.4   | 97      | 10.9  | 162   | 9.2   | 38                                                                                            | 11.7  | 39      | 16.0  | 77    | 13.6  |
| Arrhythmia               | 8                                                      | 0.7   | 3       | 0.3   | 11    | 0.5   | 6                                                    | 0.7   | 3       | 0.3   | 9     | 0.5   | 2                                                                                             | 0.6   | 0       | 0.0   | 2     | 0.4   |
| Myocardial infarction    | 29                                                     | 2.4   | 22      | 1.9   | 51    | 2.2   | 19                                                   | 2.2   | 14      | 1.6   | 33    | 1.9   | 10                                                                                            | 3.1   | 8       | 3.3   | 18    | 3.2   |
| Heart failure*           | 66                                                     | 5.5   | 111     | 9.8   | 177   | 7.6   | 40                                                   | 4.5   | 80      | 9.0   | 120   | 6.8   | 26                                                                                            | 8.0   | 31      | 12.7  | 57    | 10.0  |
| Insenscence              | 19                                                     | 1.6   | 28      | 2.5   | 47    | 2.0   | 16                                                   | 1.8   | 22      | 2.5   | 38    | 2.2   | 3                                                                                             | 0.9   | 6       | 2.5   | 9     | 1.6   |
| Suicide                  | 2                                                      | 0.2   | 3       | 0.3   | 5     | 0.2   | 2                                                    | 0.2   | 3       | 0.3   | 5     | 0.3   | 0                                                                                             | 0.0   | 0       | 0.0   | 0     | 0.0   |
| Others                   | 167                                                    | 13.8  | 170     | 15.0  | 337   | 14.4  | 120                                                  | 13.6  | 136     | 15.3  | 256   | 14.5  | 47                                                                                            | 14.4  | 34      | 13.9  | 81    | 14.2  |
| Unknown                  | 13                                                     | 1.1   | 12      | 1.1   | 25    | 1.1   | 10                                                   | 1.1   | 8       | 0.9   | 18    | 1.0   | 3                                                                                             | 0.9   | 4       | 1.6   | 7     | 1.2   |
| Total                    | 1,206                                                  | 100.0 | 1,130   | 100.0 | 2,336 | 100.0 | 880                                                  | 100.0 | 886     | 100.0 | 1,766 | 100.0 | 326                                                                                           | 100.0 | 244     | 100.0 | 570   | 100.0 |

MDS: myelodysplastic syndromes; SAH: subarachnoid hemorrhage

\* $p < 0.05$ : Non-Diabetes vs Diabetes; \*\* $p < 0.01$ : Non-Diabetes vs Diabetes
